# Supplementary material for: A graphitic carbon nitride-coated quartz crystal microbalance gas sensor for H2 detection
Source: Royal Society of Chemistry journal article supplement (doi:10.1039/d3tc00870c), 2023-01-01
Supplement: d3tc00870c1.pdf [file d3tc00870c1.pdf]

## Supporting Information

# A graphitic carbon nitride-coated quartz crystal microbalance gas sensor for H<sub>2</sub> detection

*Yasushi Ishiguro,<sup>\*a</sup> Taira Nishitani,<sup>a</sup> Can Li,<sup>b</sup> and Kenji Hirakuri<sup>a</sup>*

<sup>1</sup>Department of Electrical and Electronic Engineering, Tokyo Denki University, Tokyo,  
120-8551, Japan

<sup>2</sup>Institute of Optoelectronic Materials and Devices, China Jiliang University, Hangzhou  
310018, PR China

\*Corresponding author

E-mail: [ishiguroy@mail.dendai.ac.jp](mailto:ishiguroy@mail.dendai.ac.jp) (Y. Ishiguro)

[22kmj23@ms.dendai.ac.jp](mailto:22kmj23@ms.dendai.ac.jp) (T. Nishitani)

[canli1983@gmail.com](mailto:canli1983@gmail.com) (C. Li)

[hirakuri@mail.dendai.ac.jp](mailto:hirakuri@mail.dendai.ac.jp) (K. Hirakuri).

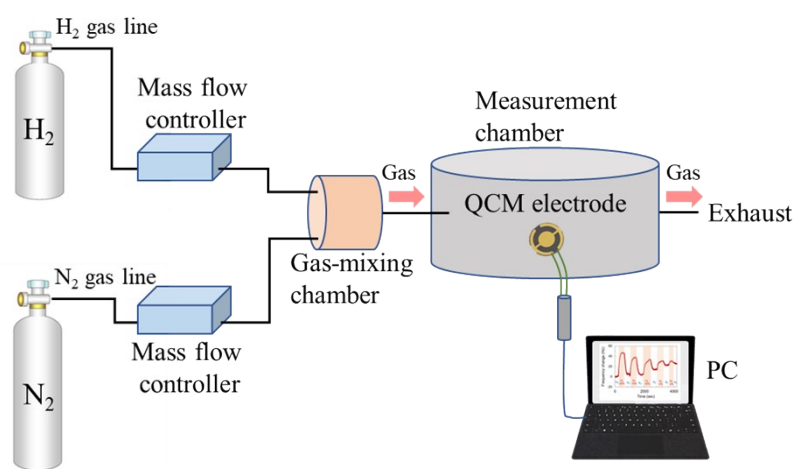

Fig. S1. Schematic diagram of the QCM gas sensor measurement apparatus.

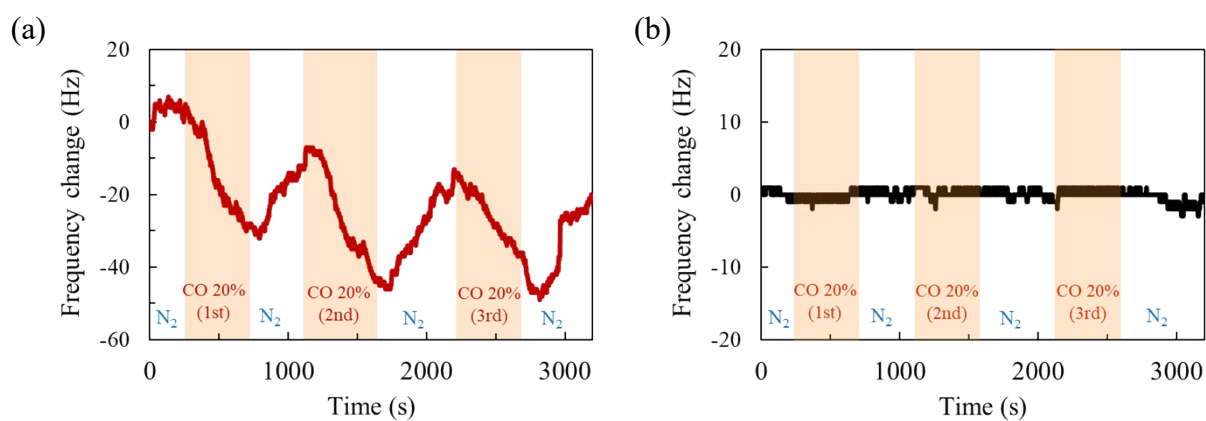

Fig. S2. Time dependence of the change in the resonant frequency upon the introduction of 20% CO gas: (a) For the g-C<sub>3</sub>N<sub>4</sub> modified electrode, and (b) for the bare electrode.

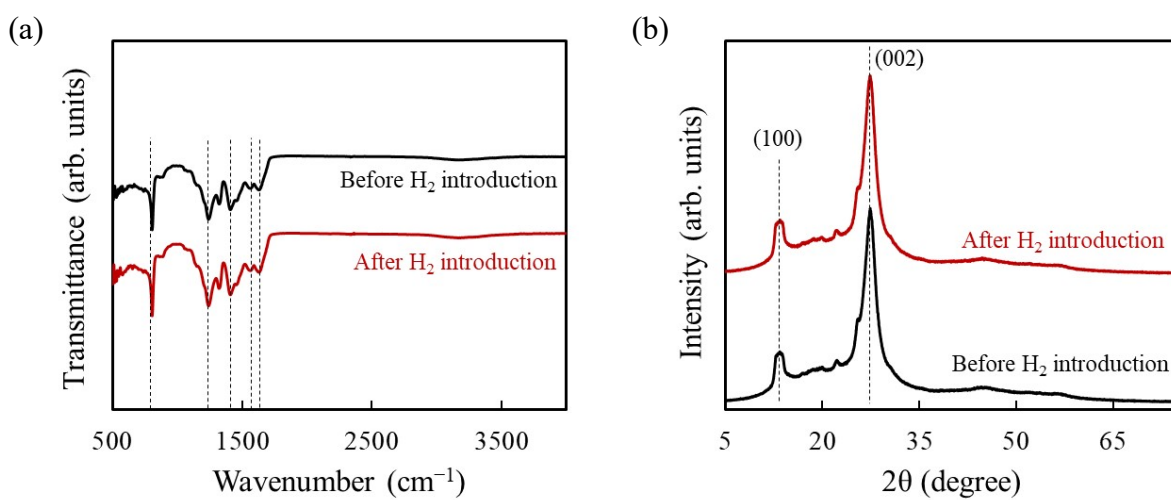

Fig. S3. (a) FT-IR spectra of the g-C<sub>3</sub>N<sub>4</sub> powder before and after 20% H<sub>2</sub> gas introduction and (b) XRD patterns of the g-C<sub>3</sub>N<sub>4</sub> powder before and after 20% H<sub>2</sub> gas introduction.

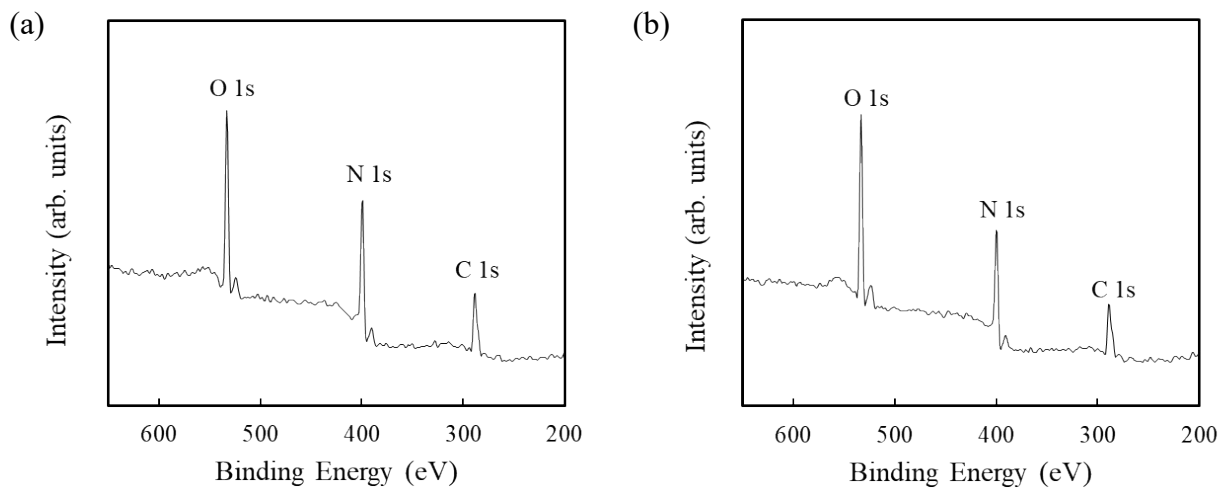

Fig. S4. XPS survey spectra of the g-C<sub>3</sub>N<sub>4</sub> film (a) before H<sub>2</sub> gas introduction and (b) after 20% H<sub>2</sub> gas introduction.

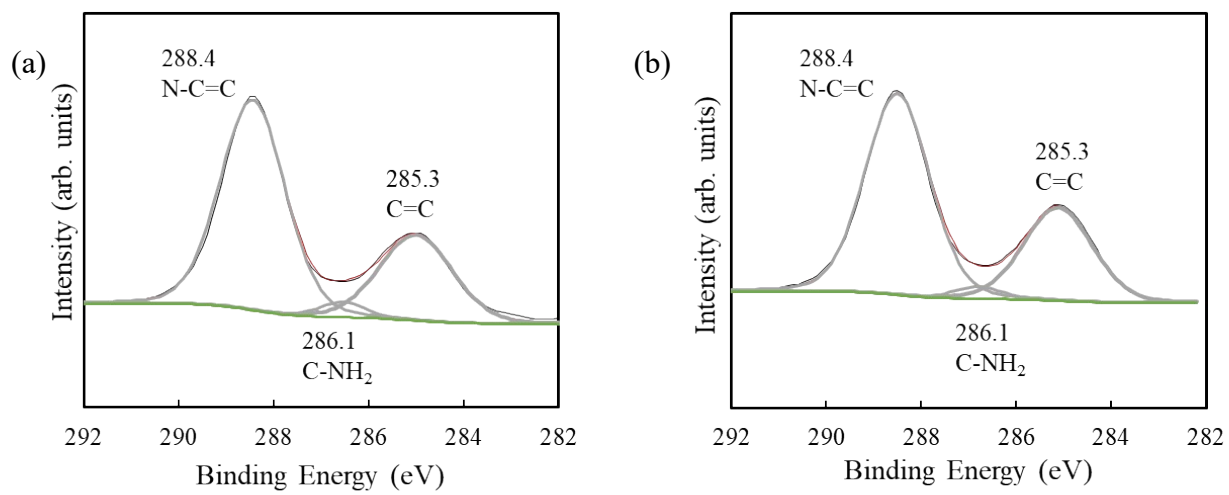

Fig. S5. XPS C 1s spectra (a) before H<sub>2</sub> gas introduction and (b) after 20% H<sub>2</sub> gas introduction.

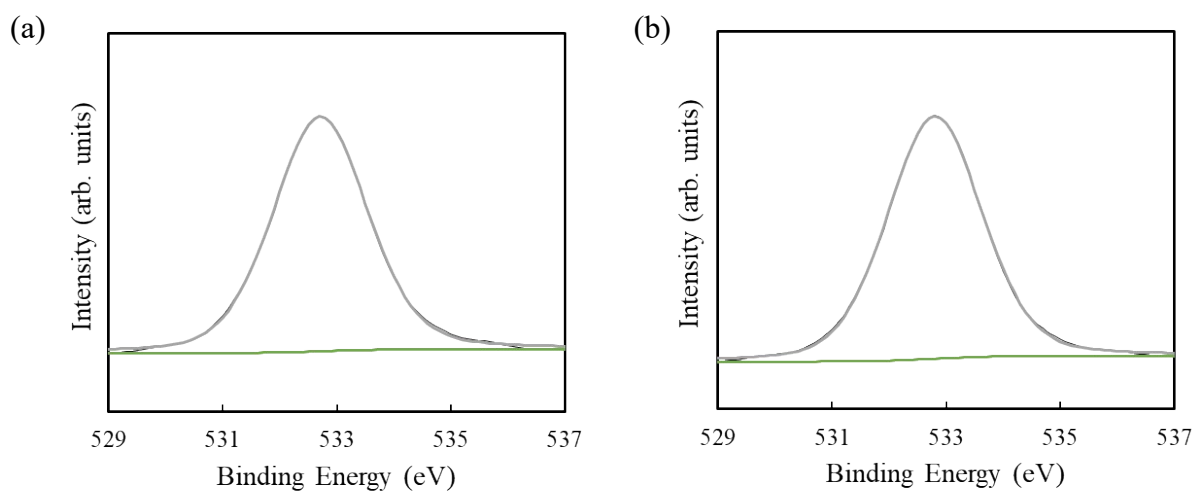

Fig. S6. XPS O 1s spectra (a) before H<sub>2</sub> gas introduction and (b) after 20% H<sub>2</sub> gas introduction.

Table S1. Atomic concentrations and C/N ratios of the melamine-based g-C<sub>3</sub>N<sub>4</sub> film before and after the introduction of 20% H<sub>2</sub> gas, as calculated from the XPS survey spectra

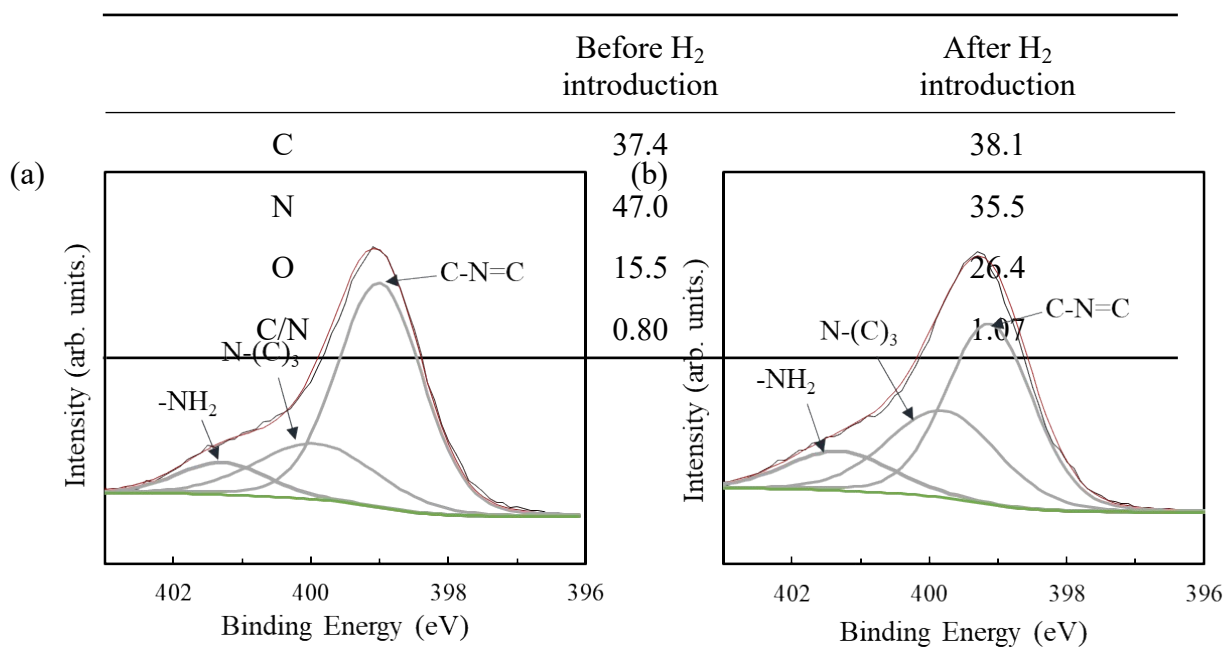

Fig. S7. XPS N 1s spectra of melamine-based g-C<sub>3</sub>N<sub>4</sub>: (a) before H<sub>2</sub> gas introduction and (b) after 20% H<sub>2</sub> gas introduction.



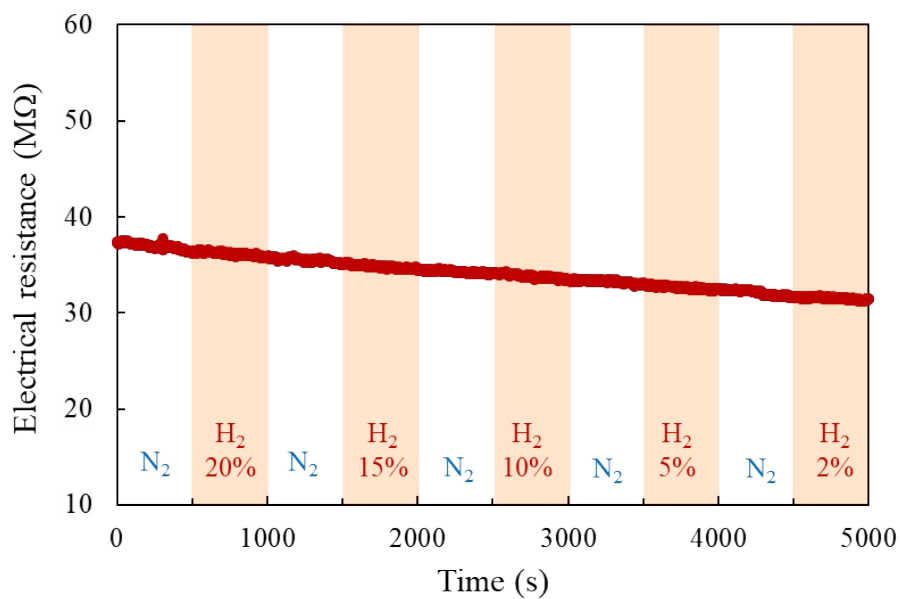

Fig. S8. Variation in the electrical resistance of the g-C<sub>3</sub>N<sub>4</sub> film over time upon the introduction of H<sub>2</sub> gas at various concentrations.
